# Supplementary material for: Nasal microbiota and symptom persistence in acute respiratory tract infections in infants
Source: PubMed Central journal article supplement — ERJ Open Res. 2018 Dec 3;4(4):00066-2018. doi: 10.1183/23120541.00066-2018 (PMC6275129; doi:10.1183/23120541.00066-2018), 2018-12-03
Supplement: 00066-2018_Table_S1.pdf [file 00066-2018_Table_S1.pdf]

**Supplementary table S1.** Shannon Diversity Indices (SDI) and Jaccard dissimilarity indices in infant clusters

**Swab A.** At the onset of ARI\*

|                      | Cluster A1  | Cluster A2  | Cluster A3  | Cluster A4  | Cluster A5  | p value <sup>§</sup> |
|----------------------|-------------|-------------|-------------|-------------|-------------|----------------------|
| Index                |             |             |             |             |             |                      |
| SDI <sup>†</sup>     | 0.67 (0.63) | 1.18 (0.68) | 1.02 (0.94) | 2.54 (1.52) | 0.87 (0.76) | < 0.001              |
| Jaccard <sup>‡</sup> | 0.35 (0.43) | 0.56 (0.35) | 0.73 (0.37) | 0.83 (0.28) | 0.81 (0.26) | < 0.001              |

**Swab B.** Three weeks after the onset of ARI\*

|                      | Cluster B1  | Cluster B2  | Cluster B3  | p value <sup>§</sup> |
|----------------------|-------------|-------------|-------------|----------------------|
| Index                |             |             |             |                      |
| SDI <sup>†</sup>     | 0.88 (0.76) | 2.40 (0.56) | 1.06 (0.69) | < 0.001              |
| Jaccard <sup>‡</sup> | 0.46 (0.34) | 0.74 (0.21) | 0.52 (0.49) | < 0.001              |

\*ARI, acute respiratory infection. <sup>†</sup>SDI, Shannon diversity index. <sup>‡</sup>Jaccard dissimilarity index. <sup>§</sup>Kruskal-Wallis test. Data are presented as median, (IQR).
