# Supplementary material for: Nasal microbiota and symptom persistence in acute respiratory tract infections in infants
Source: PubMed Central journal article supplement — ERJ Open Res. 2018 Dec 3;4(4):00066-2018. doi: 10.1183/23120541.00066-2018 (PMC6275129; doi:10.1183/23120541.00066-2018), 2018-12-03
Supplement: 00066-2018_Table_S2.pdf [file 00066-2018_Table_S2.pdf]

**Supplementary table S2.** Host and environmental characteristics in infant clusters present at the onset of ARI\* (swab A)

| Cluster           | A1            | A2                 | A3                 | A4                 | A5                 | p value            |
|-------------------|---------------|--------------------|--------------------|--------------------|--------------------|--------------------|
| (n = 165)         | (n = 56)      | (n = 51)           | (n = 31)           | (n = 14)           | (n = 13)           |                    |
| Age, months       | 7.2 [3.8-8.8] | 7.4 [5.3-8.8]      | 7.3 [3.7-9.0]      | 7.2 [4.8-9.4]      | 5.7 [4.3-8.2]      | 0.920              |
| Seasons           |               |                    |                    |                    |                    |                    |
| Spring            | 13 (23.2)     | 12 (23.5)          | 7 (22.6)           | 3 (21.4)           | 5 (38.5)           | 0.807 <sup>†</sup> |
| Summer            | 4 (7.1)       | <b>2 (3.9) ↓</b>   | <b>5 (16.1) ↑</b>  | 1 (7.1)            | 1 (7.7)            | 0.364 <sup>†</sup> |
| Autumn            | 12 (21.4)     | 11 (21.6)          | 8 (25.8)           | 2 (14.3)           | <b>5 (38.5) ↑</b>  | 0.650 <sup>†</sup> |
| Winter            | 27 (48.2)     | 26 (51.0)          | 11 (35.5)          | 8 (57.1)           | <b>2 (15.4) ↓</b>  | 0.105 <sup>†</sup> |
| Sex, male         | 33 (58.9)     | 26 (51.0)          | 18 (58.1)          | <b>11 (78.6) ↑</b> | 7 (53.9)           | 0.609 <sup>†</sup> |
| Siblings          | 35 (62.5)     | 31 (60.8)          | 20 (64.5)          | 8 (57.1)           | 10 (76.9)          | 0.761 <sup>†</sup> |
| Caesarean section | 6 (10.7)      | 8 (15.7)           | 6 (19.4)           | 3 (21.4)           | 2 (15.4)           | 0.835 <sup>†</sup> |
| Atopy             | 36 (64.3)     | <b>39 (76.5) ↑</b> | <b>12 (38.7) ↓</b> | 9 (64.3)           | <b>11 (84.6) ↑</b> | 0.008 <sup>‡</sup> |
| Childcare         | 13 (23.2)     | 9 (17.7)           | 7 (22.6)           | 3 (21.4)           | <b>0 (0.0) ↓</b>   | 0.479 <sup>†</sup> |
| Breastfeeding     | 31 (55.4)     | 33 (64.7)          | 17 (54.8)          | 8 (57.1)           | 10 (76.9)          | 0.768 <sup>‡</sup> |
| ETS <sup>§</sup>  | 6 (10.7)      | 5 (9.8)            | 6 (19.4)           | <b>4 (28.6) ↑</b>  | 3 (23.1)           | 0.355 <sup>†</sup> |

\*ARI, acute respiratory tract infection. Data are presented as median [interquartile range] or n (%). Statistical analyses were performed using a Kruskal Wallis test for age and Fisher's exact test<sup>†</sup> or Chi-square test<sup>‡</sup> for categorical variables. Significant overrepresentation (bold letters, ↑) and significant underrepresentation (bold/italic letters, ↓) of presence of symptoms in the clusters was assessed by enrichment analysis. <sup>§</sup>ETS, environmental tobacco smoke exposure.
