# Supplementary material for: Nasal microbiota and symptom persistence in acute respiratory tract infections in infants
Source: PubMed Central journal article supplement — ERJ Open Res. 2018 Dec 3;4(4):00066-2018. doi: 10.1183/23120541.00066-2018 (PMC6275129; doi:10.1183/23120541.00066-2018), 2018-12-03
Supplement: 00066-2018_Table_S3.pdf [file 00066-2018_Table_S3.pdf]

**Supplementary table S3.** Host and environmental characteristics in infant clusters three weeks after the onset of ARI\* (swab B)

| Cluster<br>(n = 155) | B1<br>(n = 96)     | B2<br>(n = 34)    | B3<br>(n = 25)     | p value            |
|----------------------|--------------------|-------------------|--------------------|--------------------|
| Age, months          | 7.1 [4.9-8.7]      | 8.0 [4.9-9.3]     | 6.0 [3.8-8.5]      | 0.142              |
| Seasons              |                    |                   |                    |                    |
| Spring               | 24 (25.0)          | 7 (20.6)          | 5 (20.0)           | 0.892 <sup>†</sup> |
| Summer               | 9 (9.4)            | 4 (11.8)          | <b>0 (0.0) ↓</b>   | 0.216 <sup>†</sup> |
| Autumn               | 22 (22.9)          | 6 (17.6)          | 6 (24.0)           | 0.852 <sup>†</sup> |
| Winter               | 41 (42.7)          | 17 (50.0)         | 14 (56.0)          | 0.438 <sup>†</sup> |
| Sex, male            | 54 (56.3)          | 17 (50.0)         | <b>18 (72.0) ↑</b> | 0.471 <sup>†</sup> |
| Siblings             | 65 (67.7)          | 15 (44.1)         | 18 (72.0)          | 0.095 <sup>‡</sup> |
| Caesarean section    | 12 (12.5)          | <b>9 (26.5) ↑</b> | <b>1 (4.0) ↓</b>   | 0.085 <sup>‡</sup> |
| Atopy                | 67 (69.8)          | 20 (58.8)         | 15 (60.0)          | 0.699 <sup>‡</sup> |
| Childcare            | <b>24 (25.0) ↑</b> | <b>3 (8.8) ↓</b>  | <b>2 (8.0) ↓</b>   | 0.030 <sup>†</sup> |
| Breastfeeding        | 55 (57.3)          | 19 (55.9)         | <b>20 (80.0) ↑</b> | 0.199 <sup>‡</sup> |
| ETS <sup>§</sup>     | 12 (12.5)          | 6 (17.7)          | 5 (20.0)           | 0.814 <sup>†</sup> |

\*ARI, acute respiratory tract infection. Data are presented as median [interquartile range] or n (%). Statistical analyses were performed using a Kruskal Wallis test for age and Fisher's exact test<sup>†</sup> or Chi-square test<sup>‡</sup> for categorical variables. Significant overrepresentation (bold letters, ↑) and significant underrepresentation (bold/italic letters, ↓) of presence of symptoms in the clusters was assessed by enrichment analysis. <sup>§</sup>ETS, environmental tobacco smoke exposure.
