# Supplementary material for: Nasal microbiota and symptom persistence in acute respiratory tract infections in infants
Source: PubMed Central journal article supplement — ERJ Open Res. 2018 Dec 3;4(4):00066-2018. doi: 10.1183/23120541.00066-2018 (PMC6275129; doi:10.1183/23120541.00066-2018), 2018-12-03
Supplement: 00066-2018_Table_S4.pdf [file 00066-2018_Table_S4.pdf]

**Supplementary table S4.** Infant clusters and detected viruses at the onset of ARI\* (swab A)

| Cluster   | A1        | A2                 | A3                 | A4               | A5               | p value            |
|-----------|-----------|--------------------|--------------------|------------------|------------------|--------------------|
| (n = 165) | (n = 56)  | (n = 51)           | (n = 31)           | (n = 14)         | (n = 13)         |                    |
| Any virus | 26 (46.4) | <b>20 (39.2) ↓</b> | <b>20 (64.5) ↑</b> | 7 (50.0)         | 7 (53.8)         | 0.267 <sup>†</sup> |
| HRV/EV    | 8 (14.3)  | 5 (9.8)            | 6 (19.4)           | 2 (14.3)         | 2 (15.4)         | 0.773 <sup>‡</sup> |
| RSV       | 8 (14.3)  | 11 (21.6)          | 5 (16.1)           | 3 (21.4)         | 3 (23.1)         | 0.808 <sup>‡</sup> |
| HMPV      | 3 (5.4)   | <b>0 (0.0) ↓</b>   | <b>5 (16.1) ↑</b>  | 1 (7.1)          | 1 (7.7)          | 0.030 <sup>‡</sup> |
| HCoV      | 4 (7.1)   | 4 (7.8)            | 1 (3.2)            | <b>0 (0.0) ↓</b> | <b>0 (0.0) ↓</b> | 0.836 <sup>‡</sup> |
| HPIV      | 7 (7.1)   | <b>2 (3.9) ↓</b>   | 5 (16.1)           | 2 (14.3)         | 1 (7.7)          | 0.293 <sup>‡</sup> |
| > 1 virus | 3 (5.4)   | 2 (3.9)            | 2 (6.5)            | 1 (7.1)          | 0 (0.0)          | 0.914 <sup>‡</sup> |

\*ARI, acute respiratory tract infection. Data are presented as n (%). Statistical analyses were performed using a Chi-square<sup>†</sup> or Fisher's exact test<sup>‡</sup>. Significant overrepresentation (bold letters, ↑) and significant underrepresentation (bold/italic letters, ↓) of virus detection in the clusters was assessed by enrichment analysis.
