# Supplementary material for: Nasal microbiota and symptom persistence in acute respiratory tract infections in infants
Source: PubMed Central journal article supplement — ERJ Open Res. 2018 Dec 3;4(4):00066-2018. doi: 10.1183/23120541.00066-2018 (PMC6275129; doi:10.1183/23120541.00066-2018), 2018-12-03
Supplement: 00066-2018_Table_S5.pdf [file 00066-2018_Table_S5.pdf]

**Supplementary table S5.** Infant clusters and detected viruses three weeks after the onset of ARI\*

(swab B)

| Cluster                | B1                 | B2               | B3                | p value            |
|------------------------|--------------------|------------------|-------------------|--------------------|
| (n = 155)              | (n = 96)           | (n = 34)         | (n = 25)          |                    |
| Any virus              | 33 (34.4)          | 6 (17.7)         | 9 (36.0)          | 0.162 <sup>†</sup> |
| HRV/EV                 | <b>14 (14.6) ↑</b> | <b>1 (2.9) ↓</b> | <b>0 (0.0) ↓</b>  | 0.030 <sup>‡</sup> |
| RSV                    | 11 (11.5)          | <b>2 (5.9) ↓</b> | <b>5 (20.0) ↑</b> | 0.256 <sup>‡</sup> |
| HMPV                   | 3 (3.1)            | 1 (2.9)          | 1 (4.0)           | 1.000 <sup>‡</sup> |
| HCoV                   | 4 (4.2)            | <b>0 (0.0) ↓</b> | <b>5 (20.0) ↑</b> | 0.007 <sup>‡</sup> |
| HPIV                   | 4 (4.2)            | 1 (2.9)          | <b>0 (0.0) ↓</b>  | 0.826 <sup>‡</sup> |
| > 1 virus              | 3 (8.3)            | 0 (0.0)          | 2 (8.0)           | 0.185 <sup>‡</sup> |
| New virus <sup>§</sup> | <b>28 (29.2) ↑</b> | <b>3 (8.8) ↓</b> | 7 (28.0)          | 0.042 <sup>‡</sup> |
| Type of new virus      |                    |                  |                   |                    |
| HRV/EV                 | <b>12 (12.5) ↑</b> | 0 (0.0)          | 0 (0.0)           | 0.017 <sup>‡</sup> |
| RSV                    | 9 (9.4)            | <b>1 (2.9) ↓</b> | 3 (12.0)          | 0.447 <sup>‡</sup> |
| HMPV                   | 3 (3.1)            | 1 (2.9)          | 1 (4.0)           | 1.000 <sup>‡</sup> |
| HCoV                   | 3 (3.1)            | 0 (0.0)          | <b>4 (16.0) ↑</b> | 0.021 <sup>‡</sup> |
| HPIV                   | 4 (4.2)            | 1 (2.9)          | 0 (0.0)           | 0.826 <sup>‡</sup> |

\*ARI, acute respiratory tract infection. Data are presented as n (%). Statistical analyses were performed using a <sup>†</sup>Chi-square or <sup>‡</sup>Fisher's exact test. <sup>§</sup>Positive virus detection in swab B different to result of swab A (either no or different virus detected in swab A).

Significant overrepresentation (bold letters, ↑) and significant underrepresentation (bold/italic letters, ↓) of virus detection in the clusters was assessed by enrichment analysis.
