# Supplementary material for: Nasal microbiota and symptom persistence in acute respiratory tract infections in infants
Source: PubMed Central journal article supplement — ERJ Open Res. 2018 Dec 3;4(4):00066-2018. doi: 10.1183/23120541.00066-2018 (PMC6275129; doi:10.1183/23120541.00066-2018), 2018-12-03
Supplement: 00066-2018_Table_S6.pdf [file 00066-2018_Table_S6.pdf]

**Supplementary table S6.** Risk of symptom persistence by microbiota clusters three weeks after onset of ARI\* (swab B)

| <b>Cluster<br/>(n= 155)</b>            | <b>B1<sup>†</sup><br/>(n= 96)</b> | <b>B2<br/>(n = 34)</b>  | <b>B3<br/>(n= 25)</b>   |
|----------------------------------------|-----------------------------------|-------------------------|-------------------------|
| Symptomatic after 1 week               |                                   | 0.7 (0.3-1.6);<br>0.367 | 0.7 (0.3-1.7);<br>0.383 |
| Symptomatic after 2 weeks              |                                   | 0.4 (0.1-1.9);<br>0.103 | 1.4 (0.5-3.5);<br>0.510 |
| Symptomatic after 3 weeks              |                                   | 0.2 (0.0-0.7);<br>0.016 | 3.3 (1.3-8.0);<br>0.011 |
| Continuously symptomatic for ≥ 3 weeks |                                   | 0.2 (0.0-1.2);<br>0.073 | 2.8 (1.0-7.5);<br>0.038 |

\*ARI, acute respiratory tract infection. Data are presented as odds ratio (95 % confidence interval); p value. Associations were estimated using logistic regression. <sup>†</sup>Reference level is cluster 1.
