# Supplementary material for: Nasal microbiota and symptom persistence in acute respiratory tract infections in infants
Source: PubMed Central journal article supplement — ERJ Open Res. 2018 Dec 3;4(4):00066-2018. doi: 10.1183/23120541.00066-2018 (PMC6275129; doi:10.1183/23120541.00066-2018), 2018-12-03
Supplement: 00066-2018_Table_S7.pdf [file 00066-2018_Table_S7.pdf]

**Supplementary table S7.** Association of presence of symptoms three weeks after onset of ARI\* and continuous presence of symptoms for  $\geq$  three weeks after onset of ARI with clusters three weeks after the onset of infection (swab B)

|                                                                                           | Unadjusted Model |              |         | Adjusted model 1 <sup>†</sup> |              |         | Adjusted model 2 <sup>‡</sup> |              |         |
|-------------------------------------------------------------------------------------------|------------------|--------------|---------|-------------------------------|--------------|---------|-------------------------------|--------------|---------|
|                                                                                           | Coeff            | 95 % CI      | p value | Coeff                         | 95 % CI      | p value | Coeff                         | 95 % CI      | p value |
| <b>Outcome:</b> Presence of symptoms three weeks after onset of ARI                       |                  |              |         |                               |              |         |                               |              |         |
| Cluster B1 <sup>§</sup>                                                                   | .                | .            | .       | .                             | .            | .       | .                             | .            | .       |
| Cluster B2                                                                                | -1.83            | -3.33, -0.34 | 0.016   | -1.91                         | -3.42, -0.39 | 0.014   | -1.89                         | -3.45, -0.33 | 0.017   |
| Cluster B3                                                                                | 1.18             | 0.27, 2.09   | 0.011   | 1.33                          | 0.36, 2.31   | 0.007   | 1.36                          | 0.33, 2.40   | 0.009   |
| <b>Outcome:</b> Continuous presence of symptoms for $\geq$ three weeks after onset of ARI |                  |              |         |                               |              |         |                               |              |         |
| Cluster B1 <sup>§</sup>                                                                   | .                | .            | .       | .                             | .            | .       | .                             | .            | .       |
| Cluster B2                                                                                | -1.89            | -3.94, 0.17  | 0.073   | -1.90                         | -3.98, 0.17  | 0.072   | -1.88                         | -4.00, 0.25  | 0.083   |
| Cluster B3                                                                                | 1.03             | 0.06, 2.01   | 0.038   | 1.07                          | 0.04, 2.10   | 0.041   | 1.03                          | -0.06, 2.12  | 0.063   |

\*ARI, acute respiratory tract infection. <sup>†</sup>Adjusted for age and season. <sup>‡</sup>Adjusted for age, season, atopy, childcare, breastfeeding status, environmental tobacco smoke, siblings. Associations were estimated using logistic regression. <sup>§</sup>Reference level is cluster B1.
