# Supplementary material for: Nasal microbiota and symptom persistence in acute respiratory tract infections in infants
Source: PubMed Central journal article supplement — ERJ Open Res. 2018 Dec 3;4(4):00066-2018. doi: 10.1183/23120541.00066-2018 (PMC6275129; doi:10.1183/23120541.00066-2018), 2018-12-03
Supplement: 00066-2018_Table_S8.pdf [file 00066-2018_Table_S8.pdf]

**Supplementary Table S8.** Associations of detected viruses at swab A with symptom persistence

|                                        | <b>No virus<br/>(n = 85)</b> | <b>HRV/EV<br/>(n = 21)</b> | <b>RSV<br/>(n = 25)</b> | <b>HMPV<br/>(n = 9)</b> | <b>HCoV<br/>(n = 8)</b> | <b>HPIV<br/>(n = 19)</b> | <b>p value</b>     |
|----------------------------------------|------------------------------|----------------------------|-------------------------|-------------------------|-------------------------|--------------------------|--------------------|
| Symptomatic after 1 week               | 57 (67.1)                    | 17 (81.0)                  | 19 (76.0)               | 8 (88.9)                | 6 (75.0)                | 12 (63.2)                | 0.550*             |
| Symptomatic after 2 weeks              | 21 (24.7)                    | 7 (33.3)                   | 5 (20.0)                | 3 (33.3)                | 5 (62.5)                | 5 (26.3)                 | 0.283 <sup>†</sup> |
| Symptomatic after 3 weeks              | 24 (28.2)                    | 6 (28.6)                   | 7 (28.0)                | 1 (11.1)                | 4 (50.0)                | 6 (31.6)                 | 0.687 <sup>†</sup> |
| Continuously symptomatic for ≥ 3 weeks | 13 (15.3)                    | 5 (23.8)                   | 3 (12.0)                | 0 (0.0)                 | 4 (50.0)                | 3 (15.8)                 | 0.132 <sup>†</sup> |

Data are presented as n (%). Statistical analyses were performed using a Chi-square\* or Fisher's exact test<sup>†</sup>.
