# Supplementary material for: Nasal microbiota and symptom persistence in acute respiratory tract infections in infants
Source: PubMed Central journal article supplement — ERJ Open Res. 2018 Dec 3;4(4):00066-2018. doi: 10.1183/23120541.00066-2018 (PMC6275129; doi:10.1183/23120541.00066-2018), 2018-12-03
Supplement: 00066-2018_Table_S9.pdf [file 00066-2018_Table_S9.pdf]

**Supplementary Table S9.** Associations of detected viruses at swab B with symptom persistence

|                                        | <b>No virus<br/>(n = 115)</b> | <b>HRV/EV<br/>(n = 16)</b> | <b>RSV<br/>(n = 17)</b> | <b>HMPV<br/>(n = 4)</b> | <b>HCoV<br/>(n = 10)</b> | <b>HPIV<br/>(n = 5)</b> | <b>p value</b> |
|----------------------------------------|-------------------------------|----------------------------|-------------------------|-------------------------|--------------------------|-------------------------|----------------|
| Symptomatic after 1 week               | 78 (67.8)                     | 13 (81.3)                  | 13 (76.5)               | 4 (100.0)               | 7 (70.0)                 | 4 (80.0)                | 0.760          |
| Symptomatic after 2 weeks              | 28 (24.3)                     | 3 (18.8)                   | 6 (35.3)                | 2 (50.0)                | 5 (50.0)                 | 2 (40.0)                | 0.268          |
| Symptomatic after 3 weeks              | 30 (14.0)                     | 5 (31.3)                   | 2 (11.8)                | 1 (25.0)                | 6 (60.0)                 | 1 (20.0)                | 0.367          |
| Continuously symptomatic for ≥ 3 weeks | 16 (13.9)                     | 2 (12.5)                   | 4 (23.5)                | 1 (25.0)                | 4 (40.0)                 | 1 (20.0)                | 0.236          |

Data are presented as n (%). Statistical analyses were performed using a Fisher's exact test.
