# Supplementary material for: Nasal microbiota and symptom persistence in acute respiratory tract infections in infants
Source: PubMed Central journal article supplement — ERJ Open Res. 2018 Dec 3;4(4):00066-2018. doi: 10.1183/23120541.00066-2018 (PMC6275129; doi:10.1183/23120541.00066-2018), 2018-12-03
Supplement: 00066-2018_Table_S10.pdf [file 00066-2018_Table_S10.pdf]

**Supplementary Table S10.** Associations of new viruses\* at swab B with symptom persistence

|                                        | <b>No virus<br/>(n = 124)</b> | <b>HRV/EV<br/>(n = 16)</b> | <b>RSV<br/>(n = 17)</b> | <b>HMPV<br/>(n = 4)</b> | <b>HCoV<br/>(n = 10)</b> | <b>HPIV<br/>(n = 5)</b> | <b>p value</b> |
|----------------------------------------|-------------------------------|----------------------------|-------------------------|-------------------------|--------------------------|-------------------------|----------------|
| Symptomatic after 1 week               | 85 (68.5)                     | 10 (62.5)                  | 10 (58.8)               | 4 (100.0)               | 6 (60.0)                 | 4 (80.0)                | 0.871          |
| Symptomatic after 2 weeks              | 30 (24.2)                     | 3 (18.8)                   | 5 (29.4)                | 2 (50.0)                | 4 (40.0)                 | 2 (40.0)                | 0.308          |
| Symptomatic after 3 weeks              | 31 (25.0)                     | 5 (31.3)                   | 5 (29.4)                | 1 (25.0)                | 5 (50.0)                 | 1 (20.0)                | 0.214          |
| Continuously symptomatic for ≥ 3 weeks | 17 (13.7)                     | 2 (12.5)                   | 4 (23.5)                | 1 (25.0)                | 3 (30.0)                 | 1 (20.0)                | 0.209          |

Data are presented as n (%). Statistical analyses were performed using a Fisher's exact test. \*Viruses defined as new if different to result of swab A (either no or different virus detected at swab A)
